# Supplementary material for: Abrupt onset of intensive human occupation 44,000 years ago on the threshold of Sahul
Source: PubMed Central journal article supplement (PMC11111772; doi:10.1038/s41467-024-48395-x), 2024-05-22
Supplement: 41467_2024_48395_MOESM1_ESM.pdf [file 41467_2024_48395_MOESM1_ESM.pdf]

# Supplementary Information

## Supplementary Figures

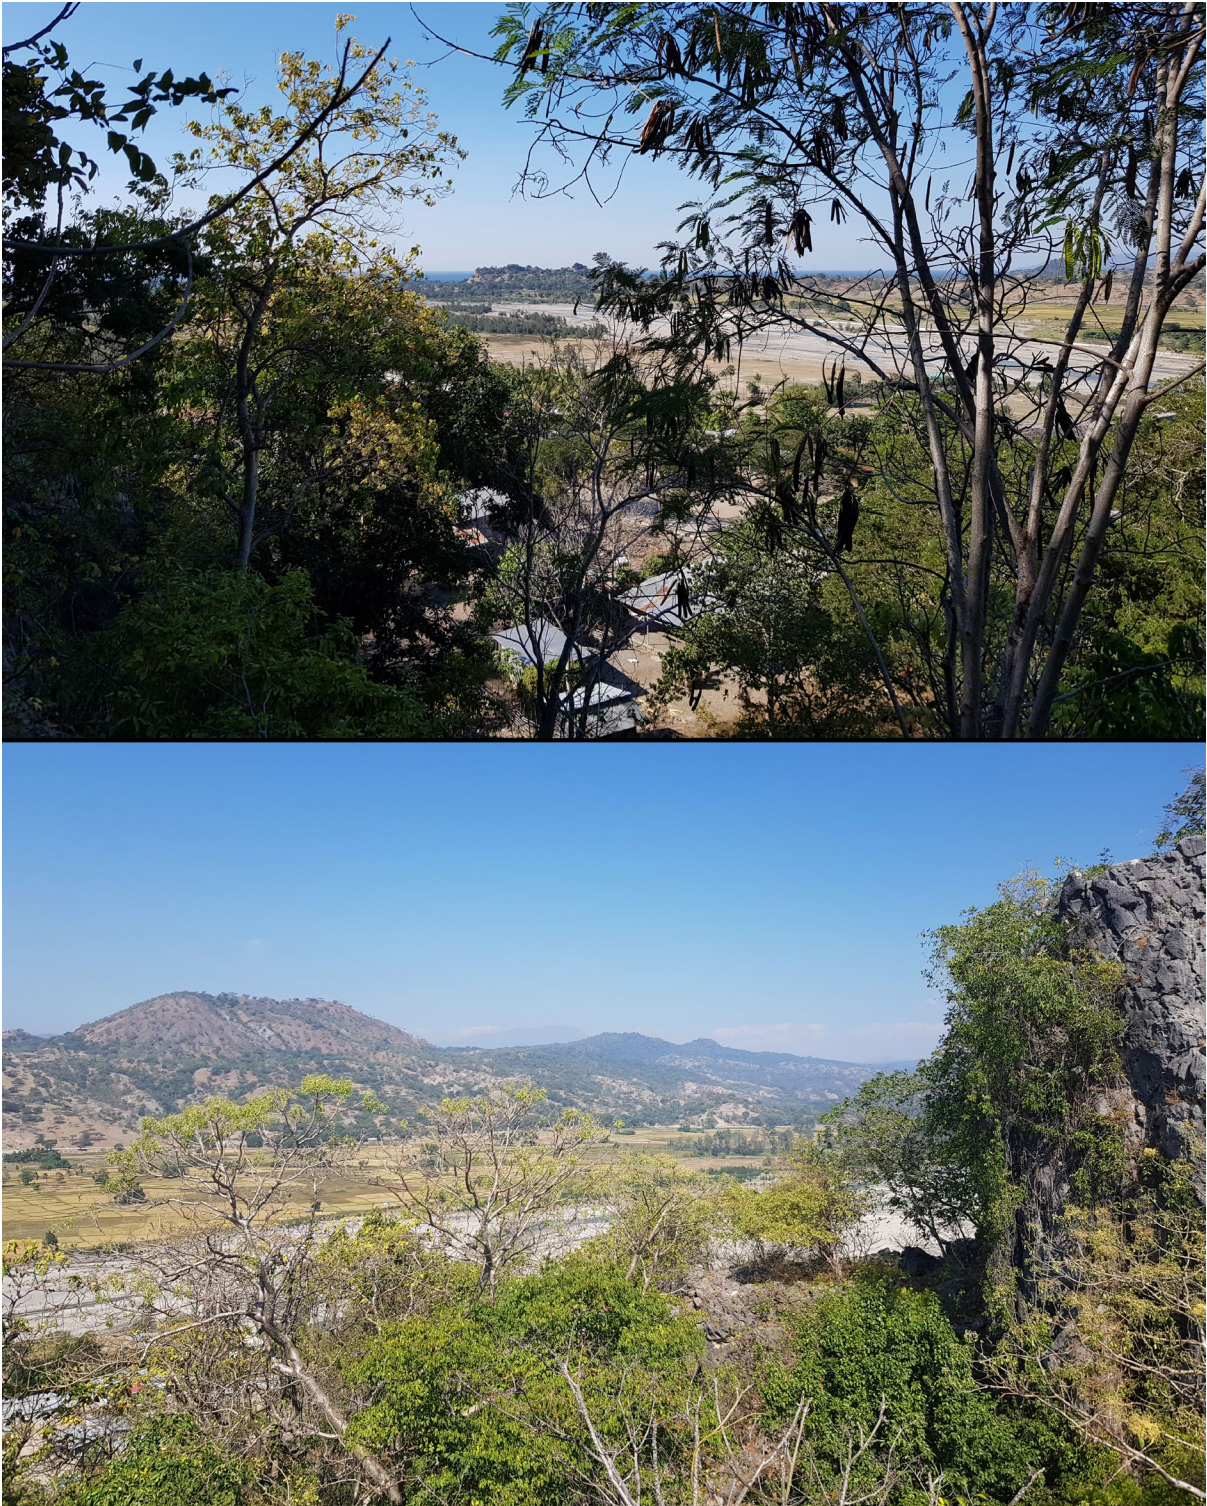

**Supplementary Figure 1.** Views from above Laili rockshelter. Above - looking downstream along the Laleia river and out to sea. Below looking upstream along the Laleia river and into the mountains.

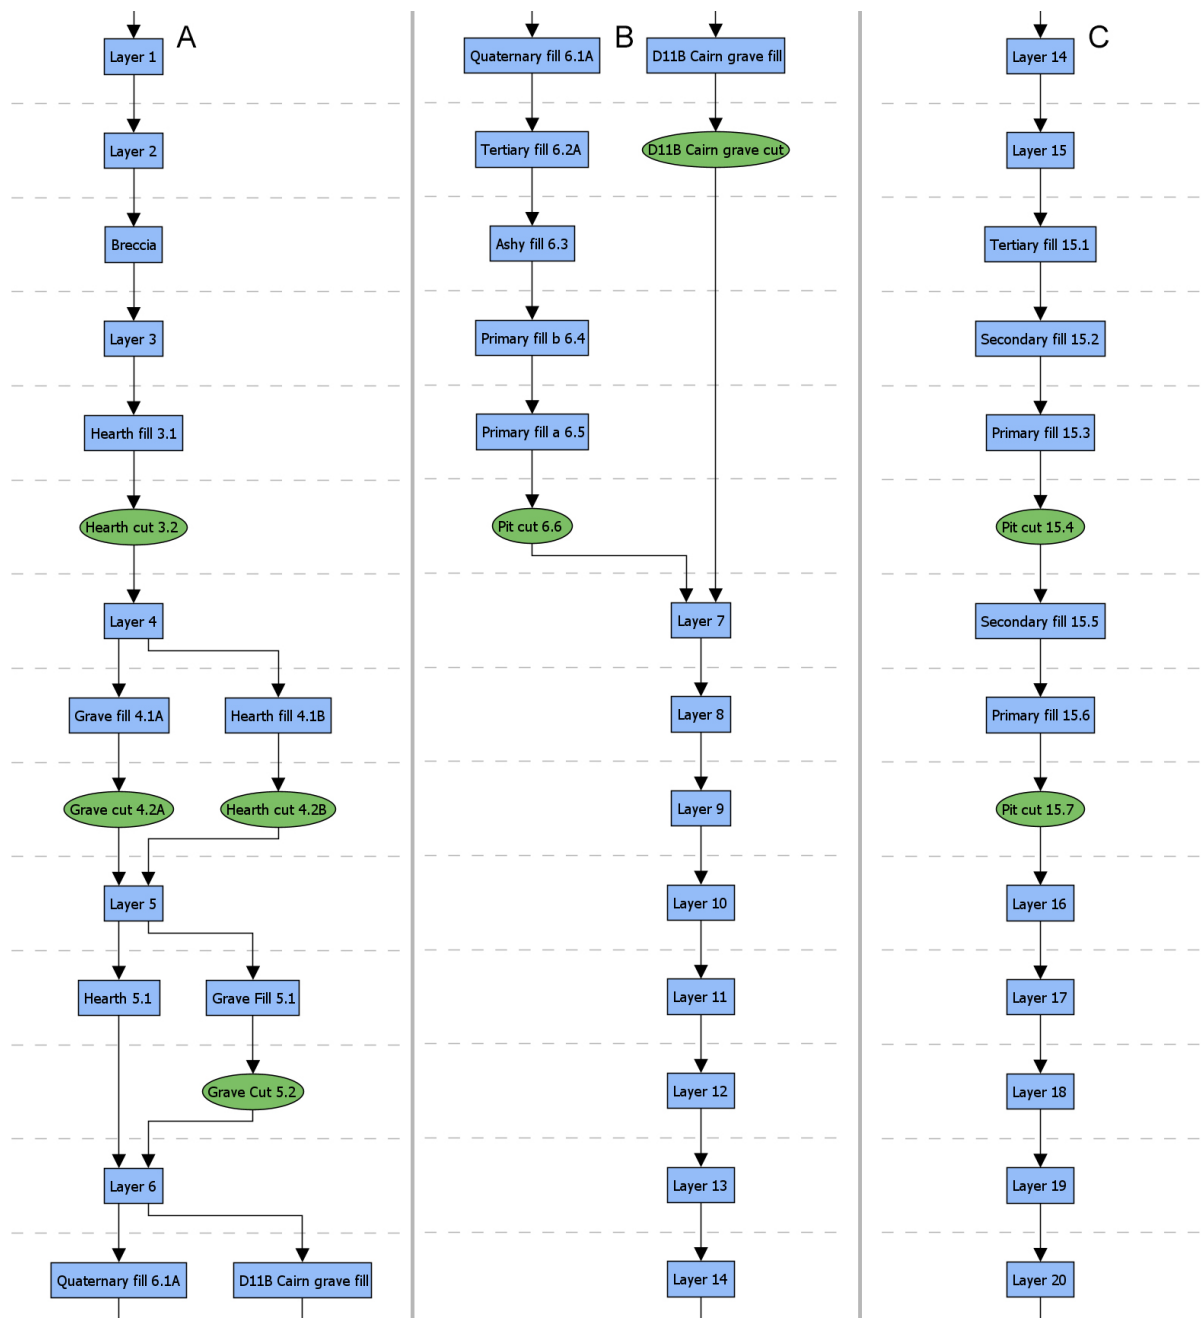

**Supplementary Figure 2.** Harris matrix showing the relationship between the deposit layers, the cave wall breccia, as well as cut and fill features for the upper (A), middle (B), and lower (C) parts of the Laili sequence. Layers and fills are shown as blue rectangles, cuts are shown as green ellipses. Layer 20 is above the culturally sterile Layer 21.

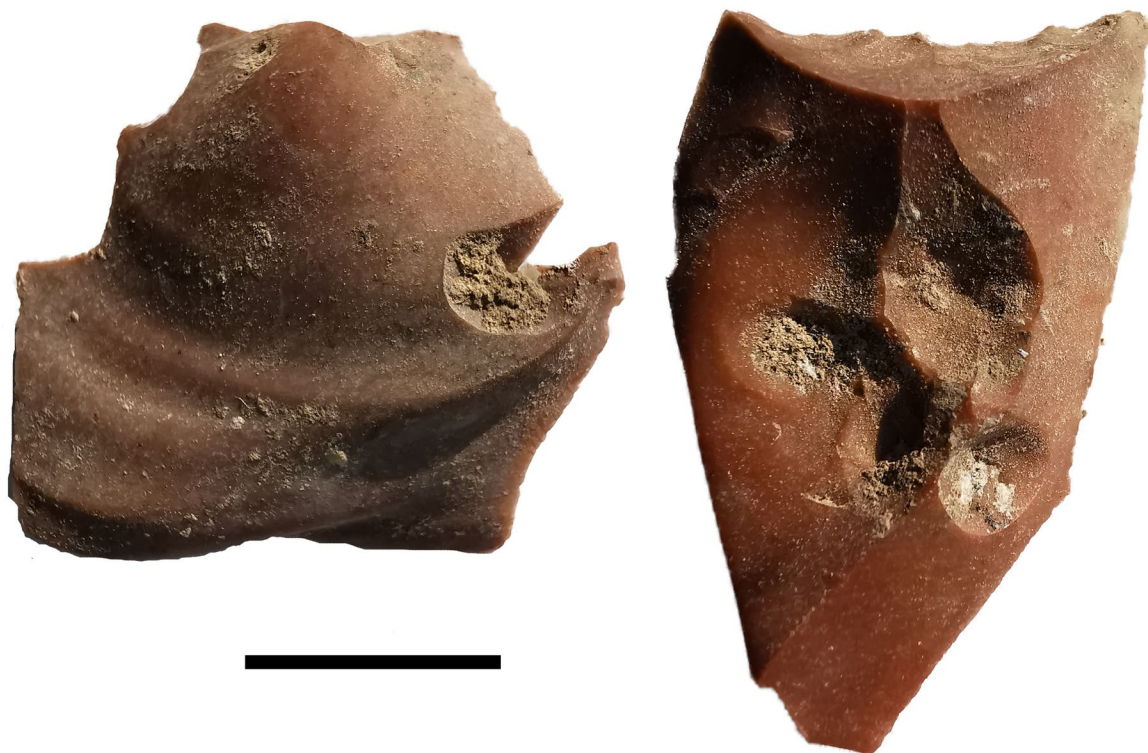

***Supplementary Figure 3.*** Lithics from the sondage showing intrusive ashy grey-brown sediment adhering to them in pot-lid cavities, distinct from the pale-yellow surrounding matrix. Scale bar is 1 cm.

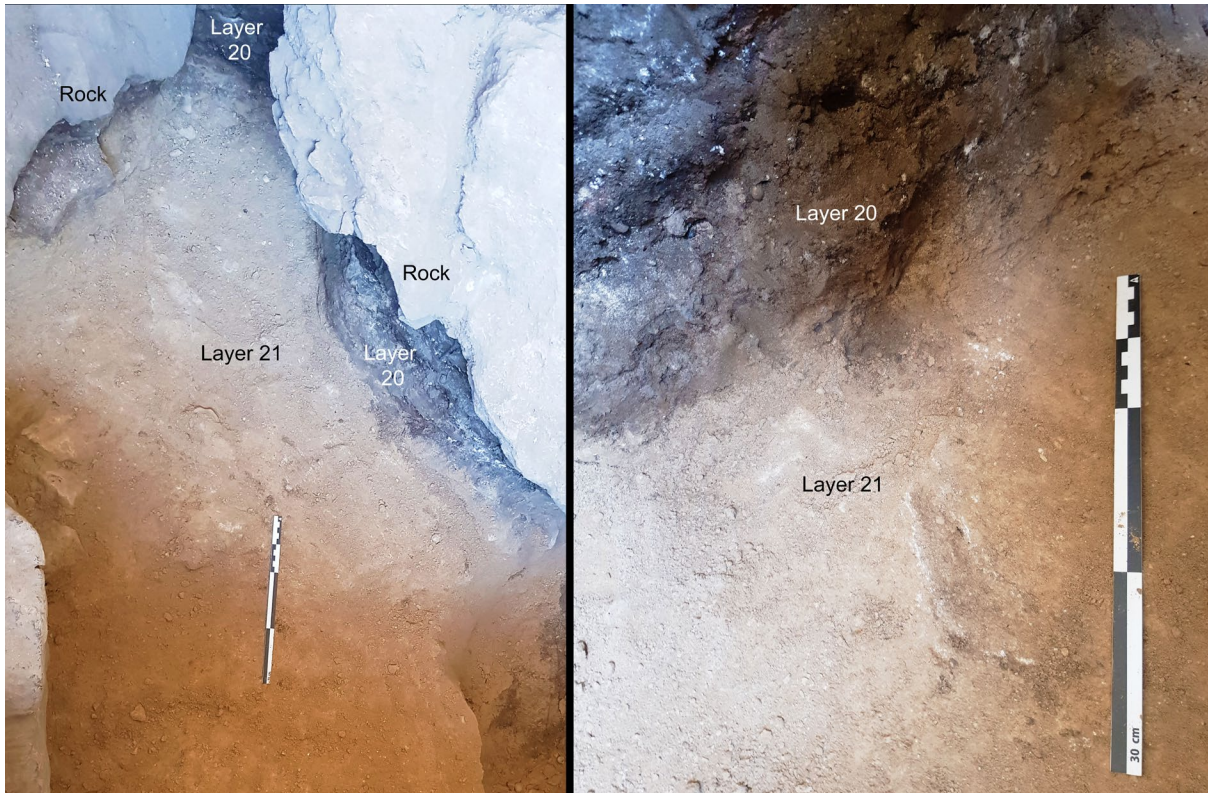

**Supplementary Figure 4.** The contrast in colour at the macro-scale between culturally sterile Layer 21 exposed horizontally during excavation and the initial occupation of Layer 20 visible in the section wall. Scale bar is 30 cm.

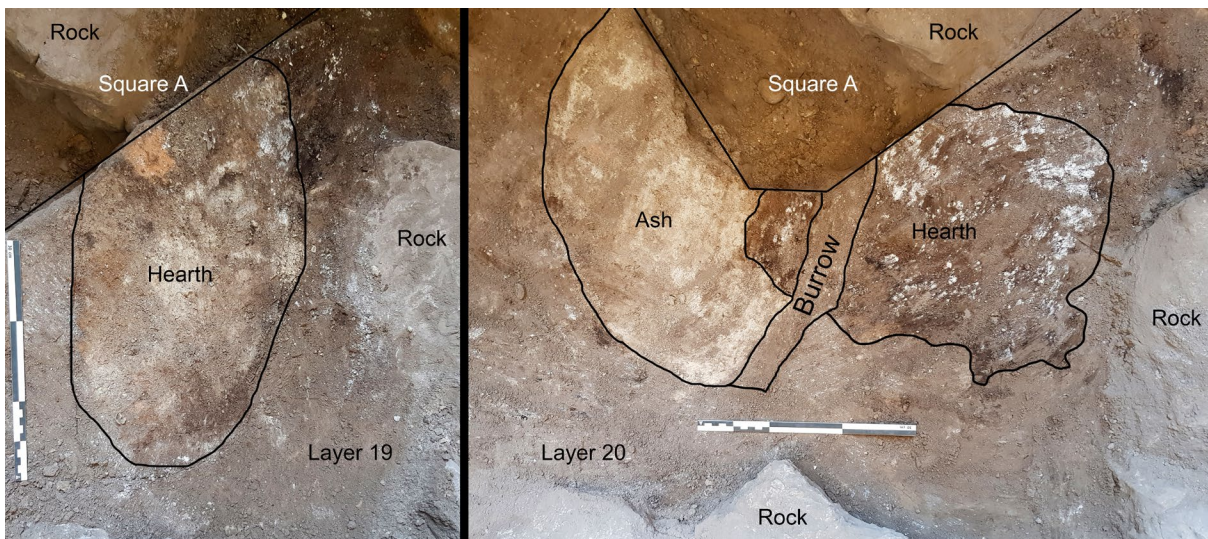

**Supplementary Figure 5.** Horizontally discrete combustion features in Layers 19 and 20. Scale bar is 30 cm.

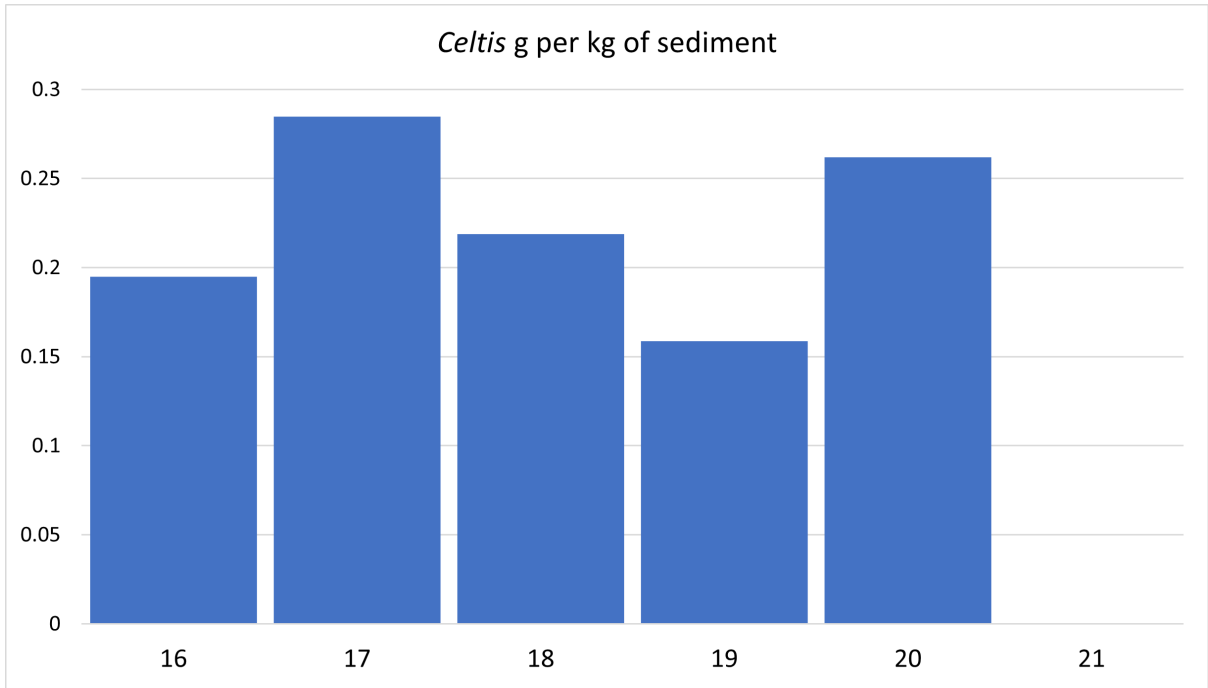

**Supplementary Figure 6.** *Celtis* seeds per kg of sediment by layer. Source data are provided in the Source Data file.

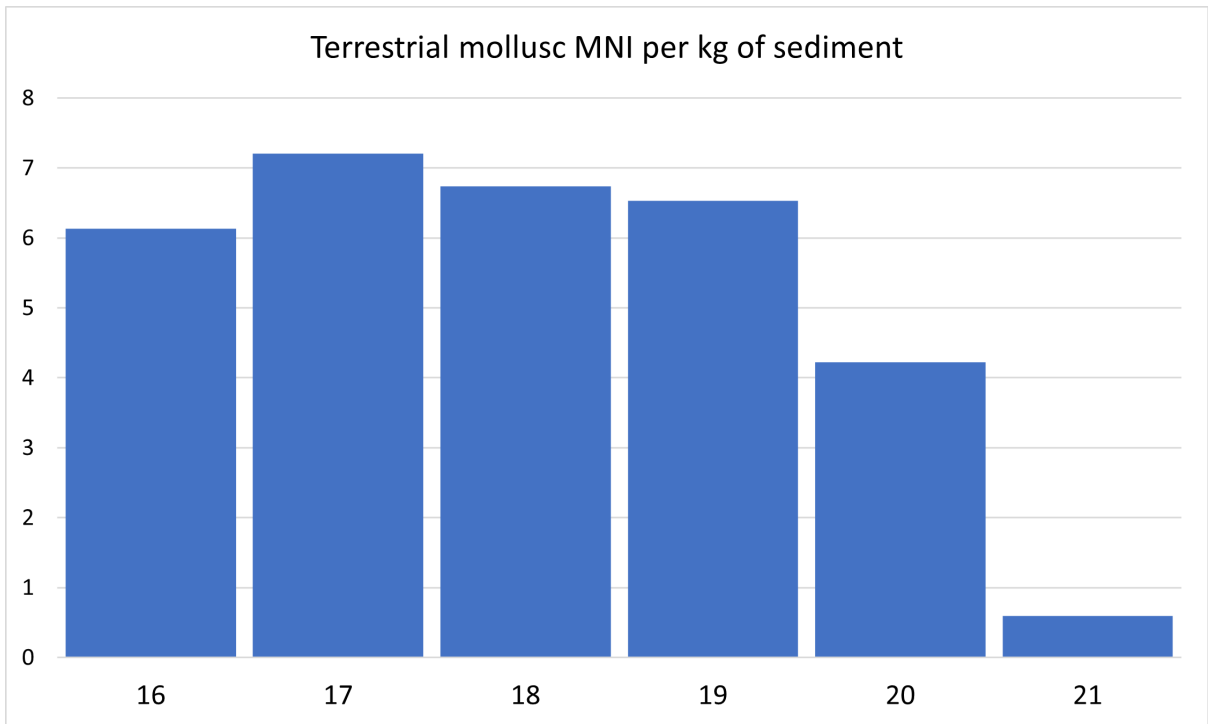

**Supplementary Figure 7.** *Terrestrial mollusc* MNI per kg of sediment by layer. Source data are provided in the Source Data file.

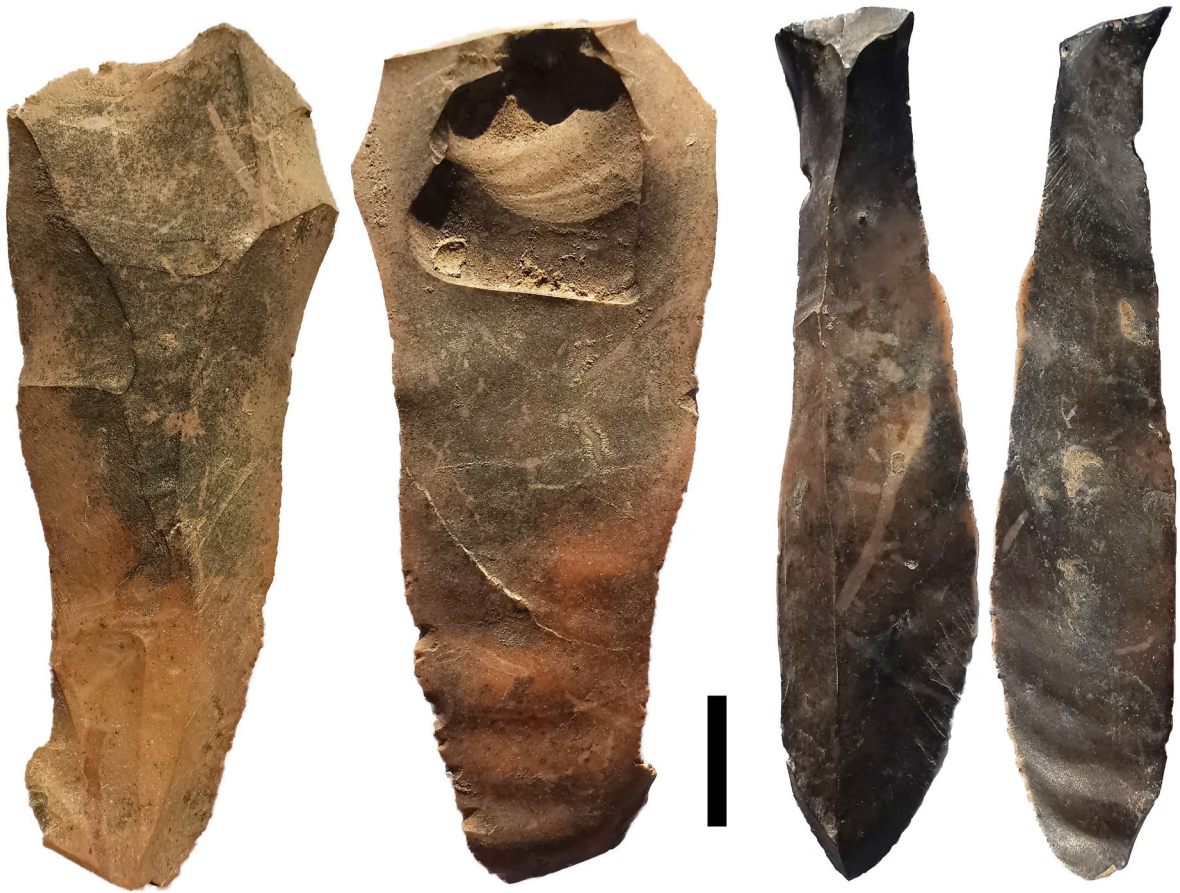

**Supplementary Figure 8.** *Examples of blades from Laili layers 20 (left) and 17 (right). Note the overhang removal on the piece on the right. Scale bar is 1 cm long.*

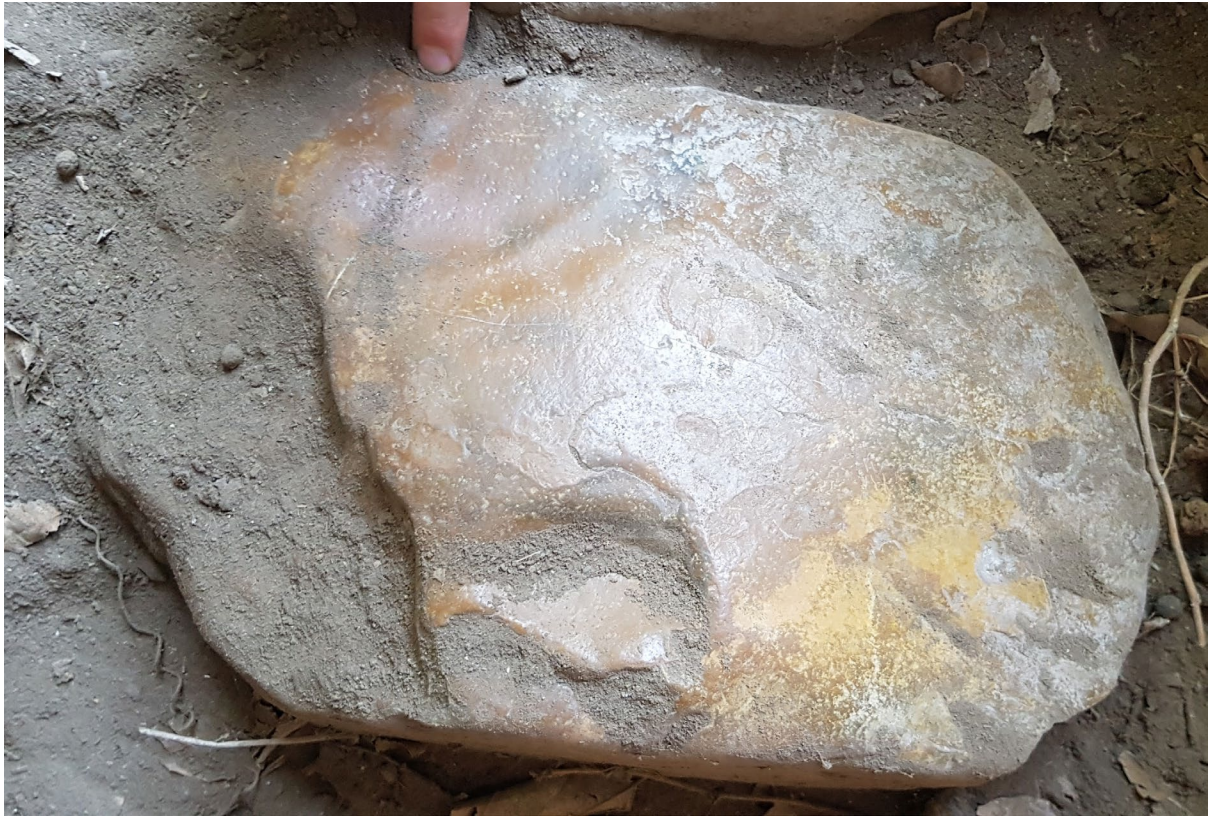

***Supplementary Figure 9.*** Large chert cobble on the surface at Laili. Note the finger scale at the top of the image (17 mm wide at the base of the nail).

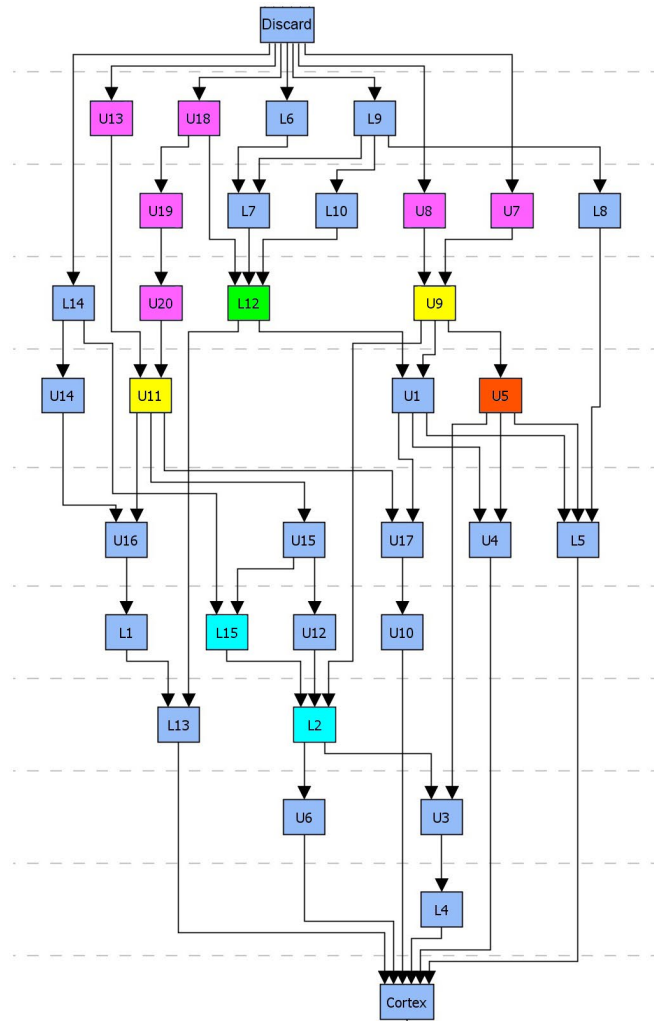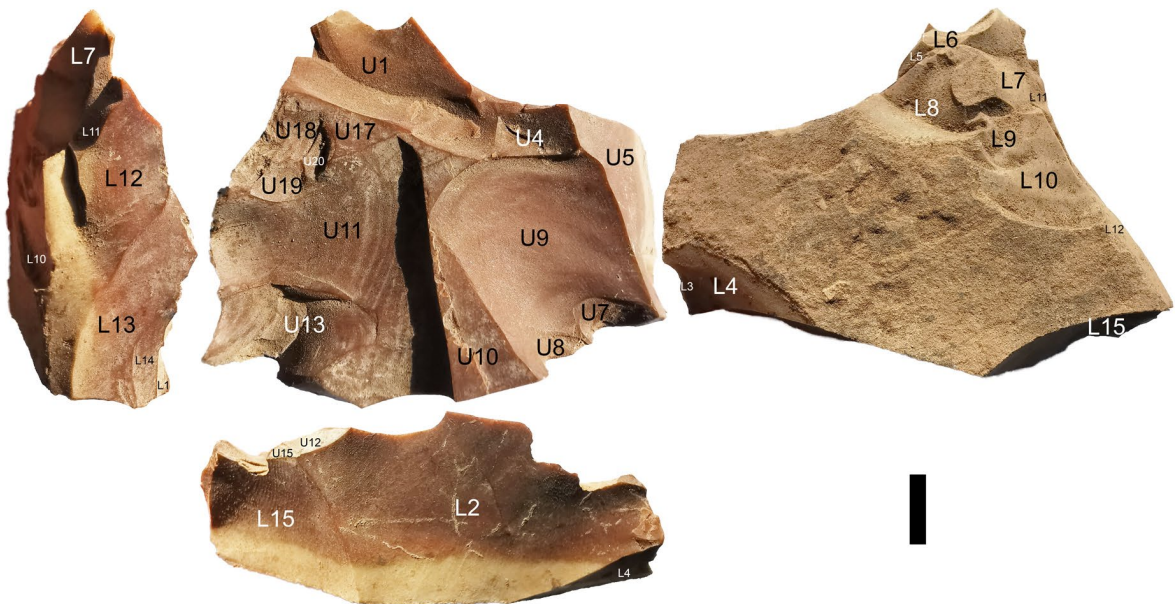

**Supplementary Figure 10.** Harris Matrix showing the life history of a core and multiple notch from Laili layer 20. Cyan shows platform creating flake scars, orange shows a convexity creating flake scar, yellow shows preferential flake scars, green shows a platform rejuvenation flake scar, and pink shows notch creating flake scars. Scale bar is 1 cm long.



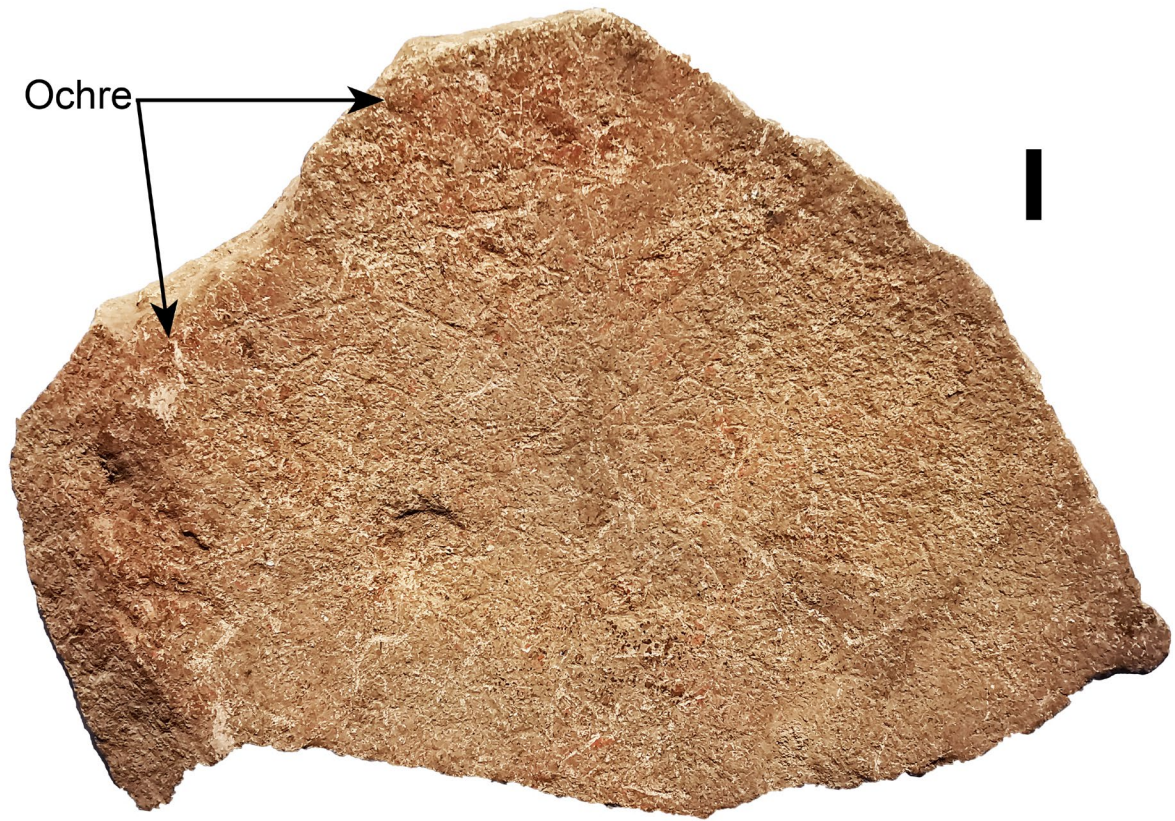

*Supplementary Figure 11. An ochre covered grinding stone from Layer 19. Scale bar is 1 cm long.*

## L19-8

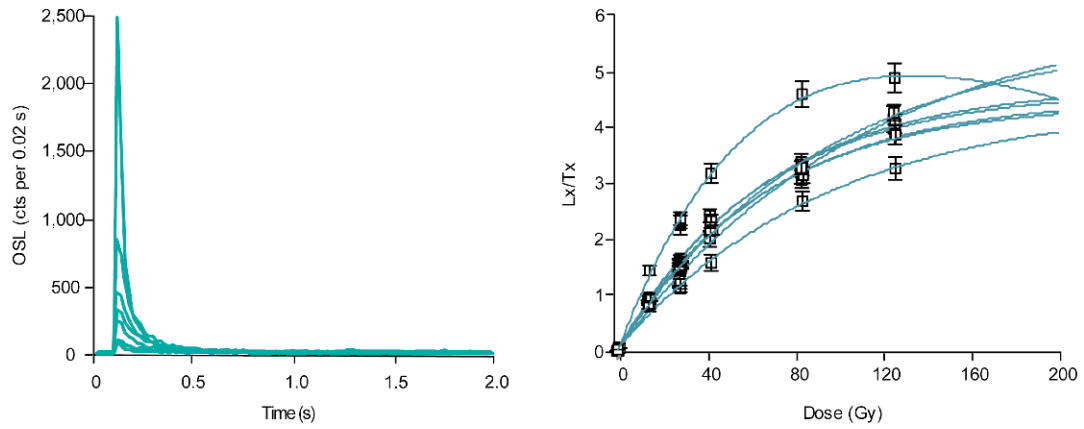

## L19-11A

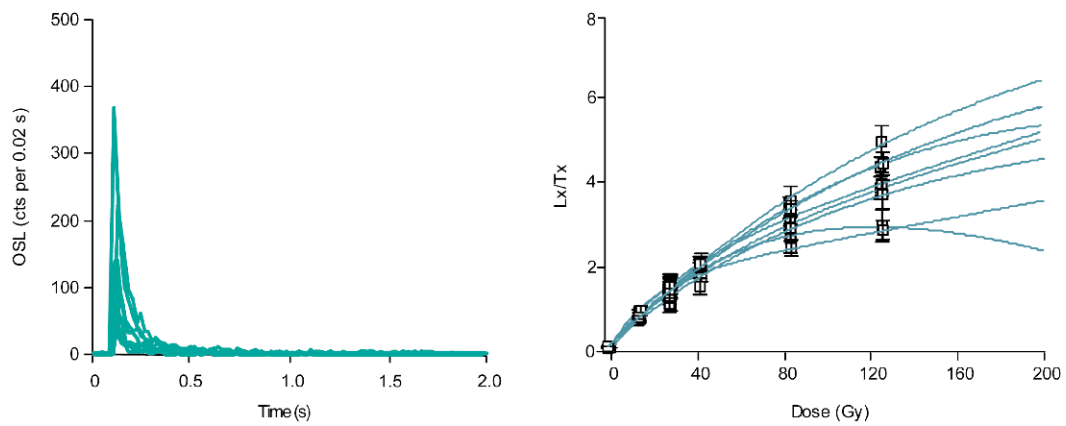

**Supplementary Figure 11.** Representative OSL decay curves and their corresponding dose response curves for a selection of grains from two samples from near the top (L19-8) and bottom (L19-11A) of the stratigraphic profile.

A

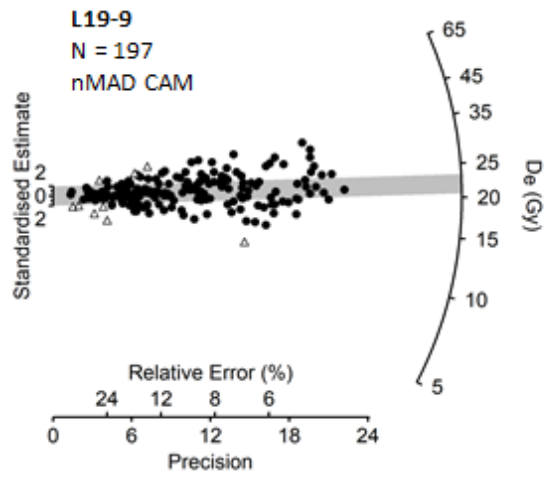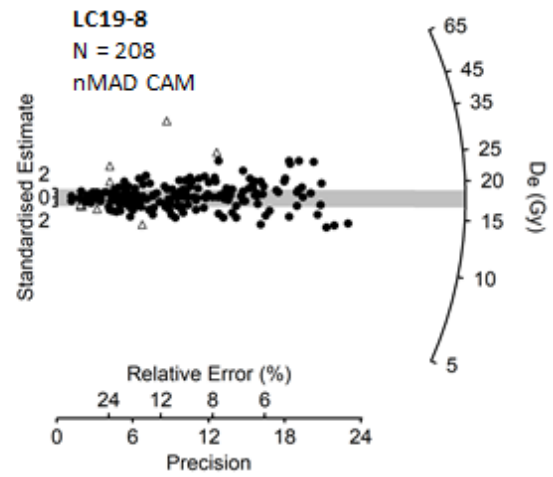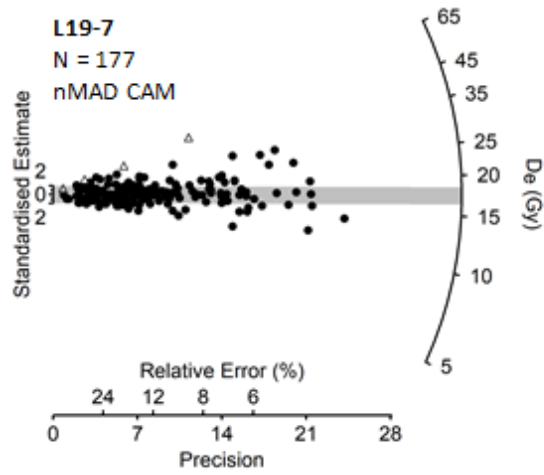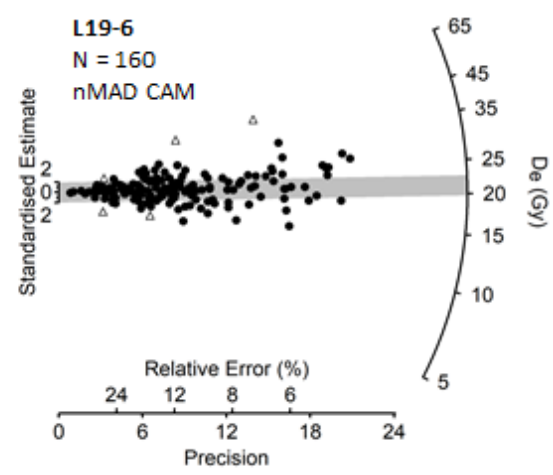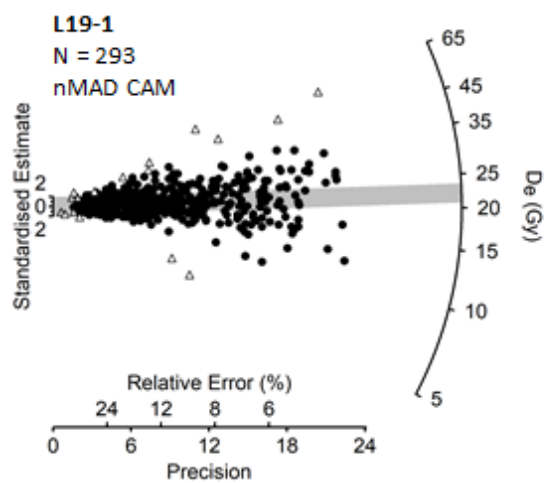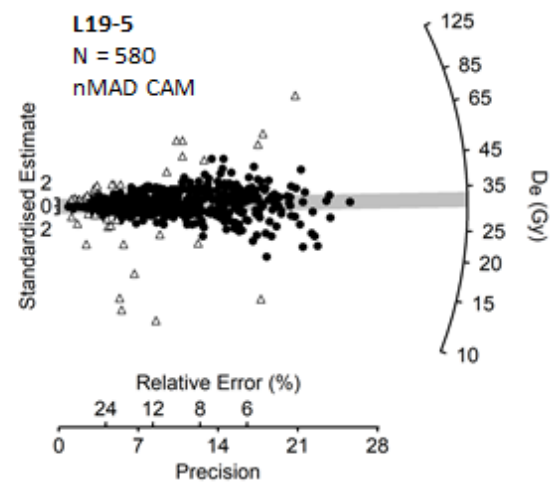

**B**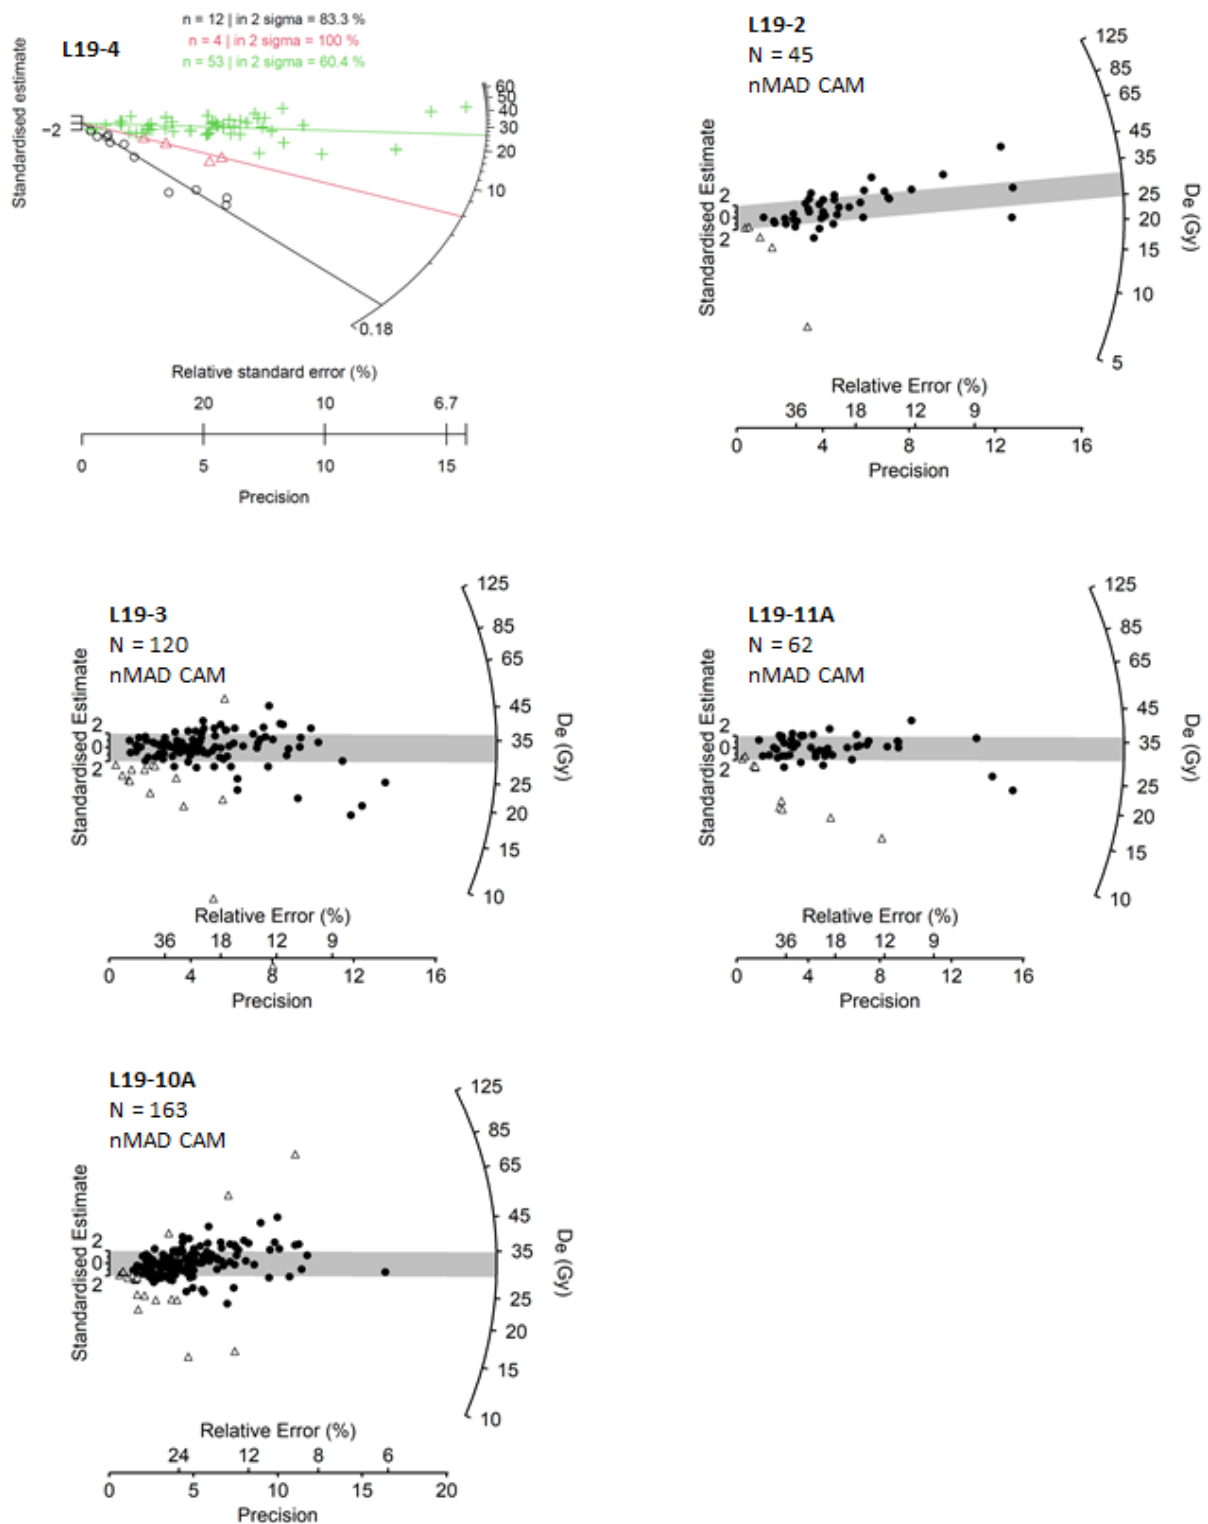

**Supplementary Figure 12.** Radial plots for the eleven samples measured in this study. 12A shows samples from cultural layers (L19-9 is from Layer 9, LC19-8 is from Layer 13, L19-7 is from pit fill 15.2, L19-6 is from pit fill 15.3, L19-1 is from pit fill 15.3, and L19-5 is from Layer 19). 12B shows samples from the sterile Layer 21 (L19-4 is from 405 cm below the Holocene surface (preserved as breccia on the rockshelter wall), L19-2 is from 415 cm below the Holocene surface, L19-3 is from 460 cm below the Holocene surface, L19-11A is

from 475 cm below the Holocene surface, and L19-10A is from 505 cm below the Holocene surface). The grey band is centred on the  $D_e$  value determined using the central age model after removal of outliers (shown as open triangles) identified using  $nMAD$ . Negative values are not shown. For L19-4 the main  $D_e$  component (as determined by the FMM and used for age estimation) is shown with green crosses, and the minor  $D_e$  components are shown in red triangles and black circles.

**A**

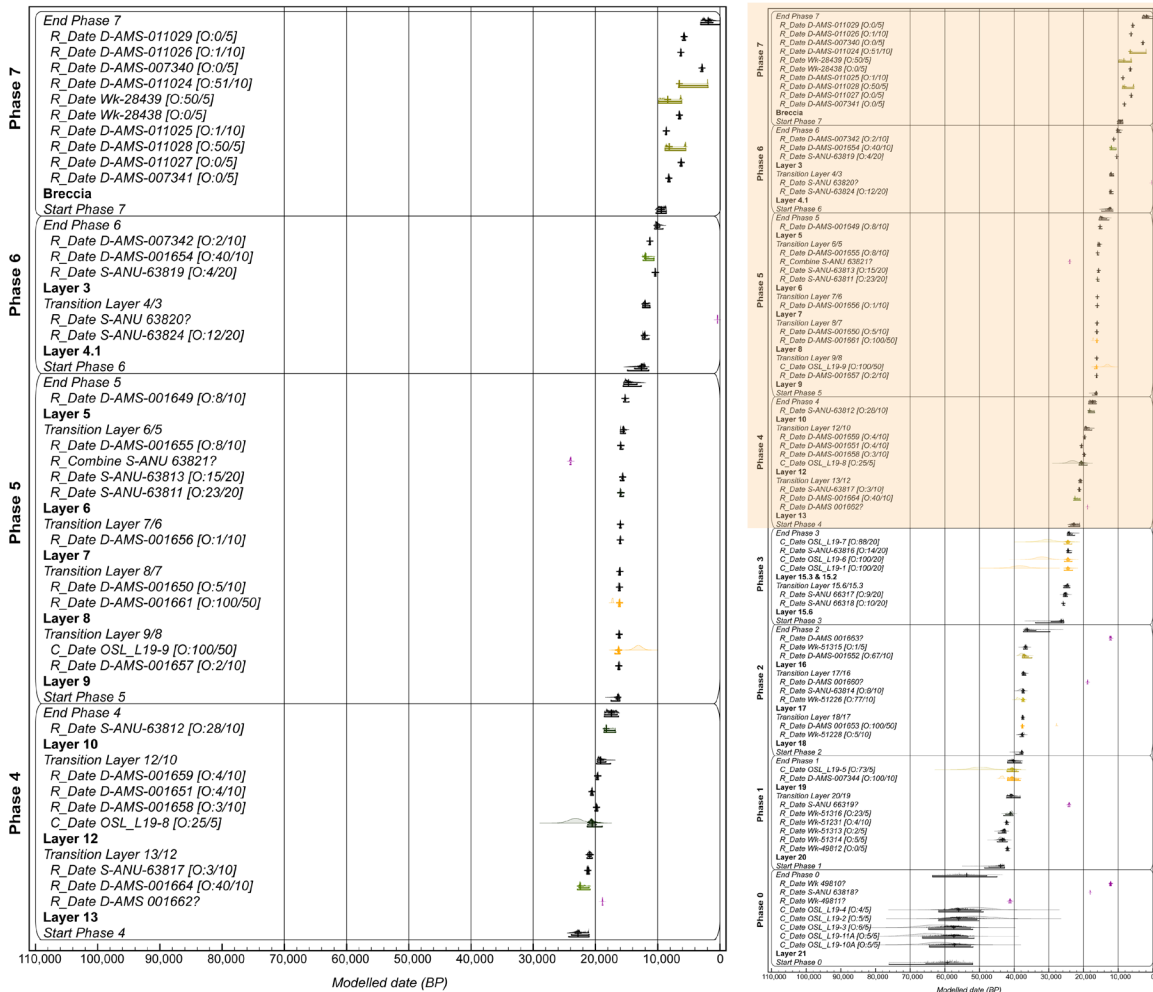

**B**

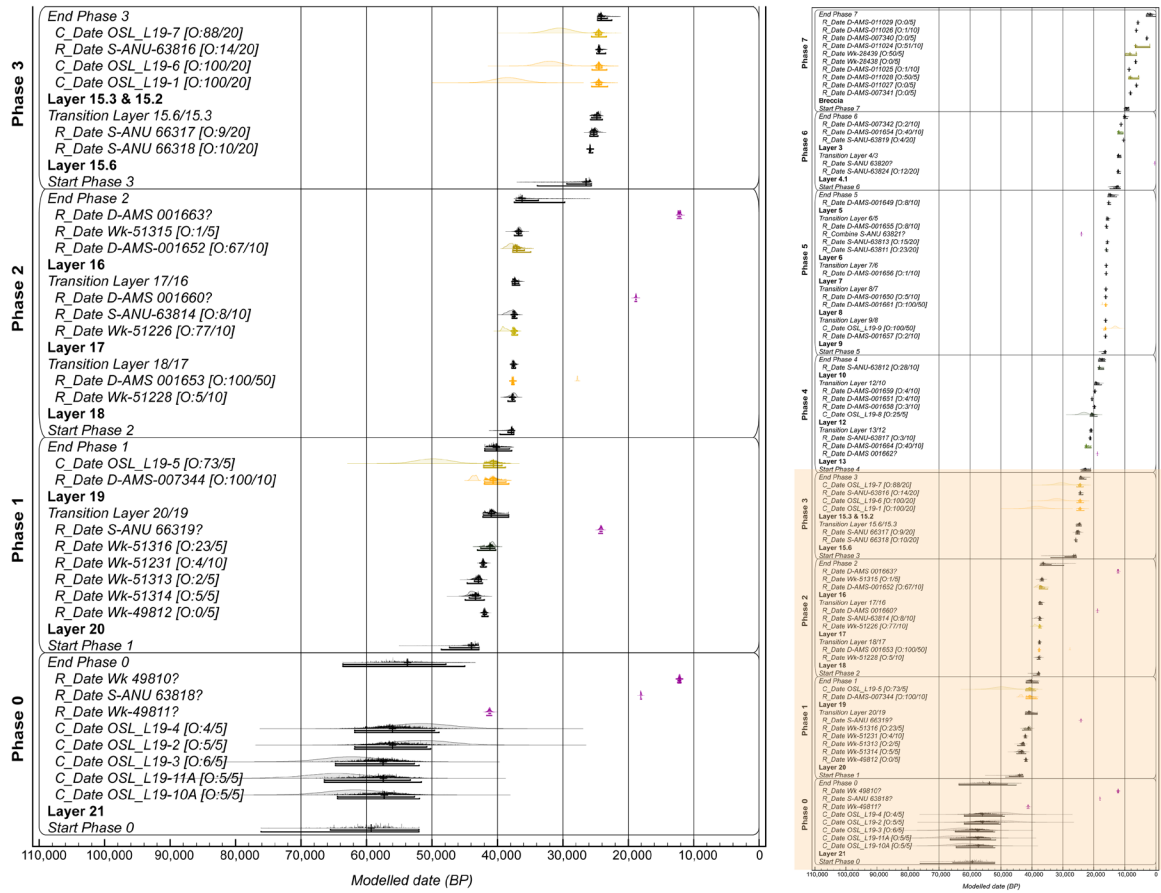

**Supplementary Figure 13.** Bayesian date model for the Laili archaeological sequence, (A = upper sequence (MIS2); B = lower sequence (MIS3) (left) and overall model (right). Outliers greater than 65% probability are coloured yellow-brown and shaded from darker to lighter in increasing outlier probability. Extreme outliers that were excluded from the model are shown in purple. The brackets beneath the distributions represent the 68.3% and 95.4% probability ranges, respectively. Prior and posterior outlier probabilities are given in brackets following the sample name in the form [O: posterior/prior].

## Supplementary Tables

**Supplementary Table 1.** Breakdown of mollusc Minimum Number of Individuals by taxa and layer for Laili Squares D and E.

| Taxa                            | 16            | 17            | 18            | 19            | 20            | 21            |
|---------------------------------|---------------|---------------|---------------|---------------|---------------|---------------|
| <i>Lunella cinerea</i>          | 4             | 7             | 13            | 8             | 22            | 0             |
| Other Turbinidae                | 11            | 15            | 7             | 6             | 18            | 2             |
| <i>Nerita</i> spp.              | 5             | 11            | 8             | 4             | 8             | 1             |
| <i>Acanthopleura</i> sp.        | 4             | 6             | 8             | 11            | 21            | 2             |
| <i>Stenomelania</i> sp.         | 4             | 6             | 6             | 4             | 4             | 1             |
| Other aquatic                   | 9             | 11            | 8             | 4             | 16            | 0             |
| Total aquatic                   | 37 (8%)       | 56 (9%)       | 50 (6%)       | 37 (7%)       | 89 (24%)      | 6 (2%)        |
| Camaenidae cf. <i>Chloritis</i> | 448           | 560           | 731           | 476           | 279           | 369           |
| <i>Amphidromus</i> sp.          | 6             | 7             | 17            | 5             | 5             | 0             |
| Unknown landsnail               | 1             | 1             | 8             | 1             | 2             | 0             |
| Total landsnail                 | 455 (92%)     | 568 (91%)     | 756 (94%)     | 482 (93%)     | 286 (76%)     | 369 (98%)     |
| Grand Total                     | 492<br>(100%) | 624<br>(100%) | 790<br>(100%) | 519<br>(100%) | 375<br>(100%) | 375<br>(100%) |

*Other aquatic* includes *Haliotis* sp., *Cellana radiata*, *Rochia niltoica*, *Tectus pyramis*, *Trochus maculatis*, *Trochus* sp., *Monodonta canalifera*, *Septaria* cf. *luzonica*, *Terebralia* spp., *Strombus* sp., *Mancinella alouina*, *Pictocolumbella* cf. *ocellata*, *Chicoreus capucinus*, *Mitra* sp., *Cymbiola verspetilio*, *Conus* sp., *Conus marmoreus*, *Austriella* cf. *corrugata*, *Tridacna* sp., and *Vasticardium* sp.

**Supplementary Table 2.** Breakdown of tetrapod Number of Individual Specimens (NISP) by taxa and layer for Laili Square C. Percentages are for non-murid identifiable specimens only by layer.

| Taxa                        | 16         | 17         | 18         | 19         | 20         | 21         |
|-----------------------------|------------|------------|------------|------------|------------|------------|
| Teleostei (ray-finned fish) | 19 (10%)   | 54 (12%)   | 94 (24%)   | 53 (36%)   | 93 (63%)   | 11 (3%)    |
| Anura (frogs)               | 5 (2%)     | 26 (6%)    | 19 (5%)    | 6 (4%)     | 4 (3%)     | 77 (19%)   |
| Lacertilia (lizards)        | 23 (12%)   | 75 (17%)   | 57 (15%)   | 10 (7%)    | 5 (3%)     | 145 (37%)  |
| Serpentes (snakes)          | 8 (4%)     | 8 (2%)     | 6 (2%)     | 6 (4%)     | 12 (8%)    | 38 (10%)   |
| Turtle                      | 0          | 0          | 0          | 1 (1%)     | 0          | 0          |
| Varanid                     | 0          | 0          | 0          | 0          | 0          | 2 (<1%)    |
| Aves (birds)                | 121 (62%)  | 238 (54%)  | 186 (47%)  | 69 (47%)   | 24 (16%)   | 71 (18%)   |
| Microbats                   | 20 (10%)   | 38 (9%)    | 29 (7%)    | 2 (1%)     | 9 (6%)     | 48 (12%)   |
| Pteropodidae (fruit bats)   | 0          | 1 (<1%)    | 2 (<1%)    | 0          | 0          | 4 (1%)     |
| Total non-murid             | 196 (100%) | 440 (100%) | 393 (100%) | 147 (100%) | 147 (100%) | 396 (100%) |
| Small Murid                 | 549        | 1016       | 767        | 348        | 205        | 5706       |
| Giant Murid                 | 51         | 75         | 57         | 9          | 16         | 496        |
| Murid to non-murid ratio    | 3.06       | 2.48       | 2.1        | 2.43       | 1.5        | 15.66      |
| Undifferentiated            | 329        | 914        | 693        | 249        | 172        | 4360       |

**Supplementary Table 3.** Breakdown of complete flake (including retouched flakes) platform types and dorsal scar patterns by layer for Laili Squares C, D, and E.

| Platform type              | Layer     |           |           |          |          |
|----------------------------|-----------|-----------|-----------|----------|----------|
|                            | 16        | 17        | 18        | 19       | 20       |
| Cortical                   | 8 (4%)    | 13 (4%)   | 10 (4%)   | 3 (2%)   | 10 (5%)  |
| Crushed                    | 43 (22%)  | 81 (22%)  | 44 (17%)  | 26 (20%) | 40 (22%) |
| Single                     | 82 (42%)  | 182 (50%) | 129 (51%) | 52 (40%) | 72 (39%) |
| Focalized                  | 40 (20%)  | 49 (14%)  | 34 (13%)  | 25 (19%) | 35 (19%) |
| Dihedral                   | 15 (8%)   | 22 (6%)   | 16 (6%)   | 5 (4%)   | 12 (6%)  |
| Multiple                   | 9 (4%)    | 14 (4%)   | 22 (9%)   | 20 (15%) | 17 (9%)  |
| <b>Dorsal scar pattern</b> |           |           |           |          |          |
| Cortical                   | 2 (1%)    | 1 (>1%)   | 2 (1%)    | 2 (2%)   | 0        |
| Proximal                   | 121 (61%) | 219 (61%) | 119 (47%) | 51 (39%) | 90 (48%) |
| Orthogonal                 | 17 (9%)   | 37 (10%)  | 46 (18%)  | 12 (9%)  | 25 (13%) |
| Bidirectional              | 22 (11%)  | 33 (9%)   | 37 (15%)  | 27 (20%) | 31 (16%) |
| Radial                     | 13 (6%)   | 14 (4%)   | 20 (8%)   | 12 (9%)  | 17 (9%)  |
| Janus                      | 17 (9%)   | 44 (12%)  | 16 (6%)   | 21 (16%) | 21 (11%) |
| Redirecting                | 6 (3%)    | 13 (4%)   | 12 (5%)   | 7 (5%)   | 5 (3%)   |

**Supplementary Table 4.** Retouched and heat damaged lithics by layer for Laili Squares C, D, and E.

| Retouched type                  | Layer |     |      |     |      | Total |
|---------------------------------|-------|-----|------|-----|------|-------|
|                                 | 16    | 17  | 18   | 19  | 20   |       |
| Burin                           | 0     | 1   | 0    | 0   | 2    | 3     |
| Notch                           | 2     | 4   | 4    | 4   | 10   | 24    |
| Scraper                         | 0     | 0   | 4    | 0   | 4    | 8     |
| Ventral                         | 0     | 1   | 2    | 0   | 1    | 4     |
| Miscellaneous                   | 0     | 0   | 0    | 3   | 3    | 6     |
| Total                           | 2     | 6   | 10   | 7   | 20   | 45    |
| Percent of all complete lithics | 1     | 1.6 | 3.8  | 5.2 | 10.4 | 4.1   |
| <b>Heat damage</b>              |       |     |      |     |      |       |
| Number of lithics               | 16    | 26  | 31   | 10  | 23   |       |
| Percent of all complete lithics | 8.1   | 7.3 | 12.4 | 8   | 12   |       |



**Supplementary Table 5.** Sample field and lab codes, layer, and depth below present and Holocene surface.

| Field Code | CABAH code  | Layer      | Depth below present surface (cm) | Depth below Holocene surface (cm) |
|------------|-------------|------------|----------------------------------|-----------------------------------|
| L19-9      | CABAH-531   | 9          | 50                               | 250                               |
| L19-8      | CABAH-530   | 12         | 95                               | 295                               |
| L19-7      | CABAH-529   | Pit (15.2) | 145                              | 345                               |
| L19-5      | CABAH-527   | 19         | 185                              | 385                               |
| L19-1      | CABAH-523   | Pit (15.3) | 197                              | 397                               |
| L19-6      | CABAH-528   | Pit (15.3) | 200                              | 400                               |
| L19-4      | CABAH-526   | 21         | 205                              | 405                               |
| L19-2      | CABAH-524   | 21         | 215                              | 415                               |
| L19-3      | CABAH-525   | 21         | 260                              | 460                               |
| L19-11A-B  | CABAH-534–5 | 21         | 275                              | 475                               |
| L19-10A-B  | CABAH-532–3 | 21         | 305                              | 505                               |

**Supplementary Table 6.** Single-grain SAR measurement procedure used in this study.

| Step | Treatment                                                                                |
|------|------------------------------------------------------------------------------------------|
| 1    | Give regenerative dose, $D_i$ <sup>a</sup>                                               |
| 2    | Preheat at 260 °C for 10 s                                                               |
| 3    | Single-grain green laser stimulation at 125 °C for 2 s ( $L_n$ or $L_x$ signal observed) |
| 4    | Give test dose, $D_t$                                                                    |
| 5    | Preheat at 160 °C for 5 s                                                                |
| 6    | Single-grain green laser stimulation at 125 °C for 2 s ( $T_n$ or $T_x$ signal observed) |
| 7    | Return to step 1 <sup>b</sup>                                                            |

<sup>a</sup> For the natural samples,  $D_i = 0$  Gy. The OSL signals for the natural dose and corresponding test dose are denoted  $L_n$  and  $T_n$  respectively, and the OSL signals for the regenerative doses and corresponding test doses are denoted  $L_x$  and  $T_x$ , respectively. The SAR sequence was repeated for several regenerative doses, including a zero dose and a duplicate dose, to monitor the extent of recuperation and determine the recycling ratio, respectively.

<sup>b</sup> A final (triplicate) regenerative dose cycle was included at the end of the sequence to check for feldspar contamination of individual quartz grains based on their OSL IR depletion ratios.

**Supplementary Table 7.** Number of individual quartz grains measured, rejected and accepted for each, together with the reasons for grain rejection (see text for reference to numbers). Samples are listed in the stratigraphic order of the layer from which they were collected (Layers 9–19, brown), and in depth order for Layer 21 (cream).

| Sample  | Grain size (µm) | No. of grains measured | Rejection criteria |    |     |    |     |   |   | Sum of grains rejected | No. of grains accepted | Negative D <sub>e</sub> values |
|---------|-----------------|------------------------|--------------------|----|-----|----|-----|---|---|------------------------|------------------------|--------------------------------|
|         |                 |                        | 1                  | 2  | 3   | 4  | 5   | 6 | 7 |                        |                        |                                |
| L19-9   | 125–90          | 500                    | 165                | 2  | 77  | 21 | 37  | 1 | 0 | 303                    | 197                    | 0                              |
| L19-8   | 125–90          | 500                    | 163                | 2  | 47  | 21 | 58  | 0 | 1 | 292                    | 208                    | 0                              |
| L19-7   | 125–90          | 500                    | 205                | 3  | 52  | 20 | 42  | 1 | 0 | 323                    | 177                    | 0                              |
| L19-6   | 125–90          | 500                    | 204                | 4  | 64  | 19 | 48  | 1 | 0 | 340                    | 160                    | 0                              |
| L19-1   | 125–90          | 1500                   | 647                | 8  | 185 | 62 | 101 | 2 | 0 | 1005                   | 495                    | 2                              |
| L19-5   | 125–90          | 1400                   | 389                | 6  | 205 | 81 | 138 | 0 | 0 | 819                    | 581                    | 1                              |
| L19-4   | 125–90          | 2000                   | 1715               | 4  | 25  | 49 | 123 | 0 | 1 | 1917                   | 83                     | 14                             |
| L19-2   | 125–90          | 1500                   | 1353               | 4  | 24  | 23 | 51  | 0 | 0 | 1455                   | 45                     | 0                              |
| L19-3   | 125–90          | 3600                   | 3137               | 13 | 47  | 91 | 184 | 1 | 0 | 3474                   | 126                    | 6                              |
| L19-11A | 125–90          | 2000                   | 1733               | 1  | 28  | 53 | 112 | 1 | 0 | 1928                   | 72                     | 10                             |
| L19-10A | 125–90          | 2900                   | 2320               | 5  | 60  | 53 | 299 | 0 | 0 | 2737                   | 163                    | 0                              |

**Supplementary Table 8.** Results of dose recovery tests on L19-2 using three preheat (PH) combinations.

| Sample | PH <sub>1</sub> | PH <sub>2</sub> | Number of grains measured/accepted | Measured/given dose ratio | OD (%)  |
|--------|-----------------|-----------------|------------------------------------|---------------------------|---------|
| L19-2  | 220 °C/10 s     | 160 °C/5 s      | 1000/24                            | 0.90 ± 0.05               | 9 ± 1%  |
| L19-2  | 260 °C/10 s     | 160 °C/5 s      | 1000/24                            | 0.96 ± 0.06               | 2 ± 1%  |
| L19-2  | 260 °C/10 s     | 220 °C/5 s      | 1000/19                            | 0.88 ± 0.07               | 19 ± 1% |

**Supplementary Table 9.** Dose rate data, equivalent dose ( $D_e$ ) and overdispersion (OD) values, and ages. Samples are listed in the stratigraphic order of the layer from which they were collected (Layers 9–19, brown), and in depth order for Layer 21 (cream).

| Sample  | Layer     | Water (%)   | External dose rate (Gy/ka) |             |        |             | $D_e$ (Gy) | OD (%)        | Statistical Model | Optical age (ka) |
|---------|-----------|-------------|----------------------------|-------------|--------|-------------|------------|---------------|-------------------|------------------|
|         |           |             | Beta                       | Gamma       | Cosmic | Total       |            |               |                   |                  |
| L19-9   | 9         | 15 ± 4 (13) | 1.13 ± 0.06                | 0.50 ± 0.06 | 0.023  | 1.67 ± 0.06 | 21.9 ± 0.4 | 27 ± 2 (24)   | nMAD CAM          | 13.1 ± 0.6       |
| L19-8   | 13        | 10 ± 3 (10) | 0.44 ± 0.02                | 0.27 ± 0.01 | 0.022  | 0.77 ± 0.03 | 17.7 ± 0.4 | 32 ± 2 (24)   | nMAD CAM          | 23.2 ± 1.1       |
| L19-7   | Pit: 15.2 | 20 ± 5 (19) | 0.34 ± 0.02                | 0.18 ± 0.01 | 0.023  | 0.57 ± 0.03 | 17.5 ± 0.4 | 31 ± 2 (27)   | nMAD CAM          | 30.5 ± 1.8       |
| L19-6   | Pit: 15.3 | 20 ± 5 (19) | 0.41 ± 0.03                | 0.20 ± 0.01 | 0.023  | 0.66 ± 0.03 | 21.1 ± 0.5 | 28 ± 2 (24)   | nMAD CAM          | 32.0 ± 1.8       |
| L19-1   | Pit: 15.3 | 20 ± 5 (19) | 0.39 ± 0.03                | 0.16 ± 0.01 | 0.020  | 0.59 ± 0.03 | 21.9 ± 0.3 | 32 ± 1 (27)   | nMAD CAM          | 38.4 ± 2.2       |
| L19-5   | 19        | 15 ± 4 (12) | 0.40 ± 0.02                | 0.19 ± 0.01 | 0.021  | 0.64 ± 0.03 | 31.7 ± 0.4 | 48 ± 2 (25)   | nMAD CAM          | 49.8 ± 2.5       |
| L19-4   | 21        | 20 ± 5 (18) | 0.29 ± 0.02                | 0.17 ± 0.01 | 0.021  | 0.51 ± 0.03 | 26.3 ± 1.9 | 138 ± 13 (39) | FMM (74%)         | 51.6 ± 4.7       |
| L19-2   | 21        | 20 ± 5 (13) | 0.32 ± 0.02                | 0.16 ± 0.01 | 0.020  | 0.53 ± 0.03 | 27.5 ± 2.0 | 107 ± 12 (39) | nMAD CAM          | 51.7 ± 4.8       |
| L19-3   | 21        | 20 ± 5 (23) | 0.34 ± 0.02                | 0.14 ± 0.01 | 0.020  | 0.53 ± 0.03 | 33.0 ± 1.4 | 84 ± 6 (35)   | nMAD CAM          | 62.3 ± 4.3       |
| L19-11A | 21        | 20 ± 5 (22) | 0.30 ± 0.02                | 0.17 ± 0.01 | 0.020  | 0.52 ± 0.03 | 33.4 ± 1.7 | 97 ± 10 (28)  | nMAD CAM          | 64.5 ± 4.9       |
| L19-10A | 21        | 30 ± 8 (30) | 0.31 ± 0.03                | 0.16 ± 0.01 | 0.020  | 0.52 ± 0.03 | 32.2 ± 1.2 | 67 ± 4 (37)   | nMAD CAM          | 61.7 ± 4.5       |
