# Supplementary material for: Abrupt onset of intensive human occupation 44,000 years ago on the threshold of Sahul
Source: PubMed Central journal article supplement (PMC11111772; doi:10.1038/s41467-024-48395-x), 2024-05-22
Supplement: 41467_2024_48395_MOESM3_ESM.pdf [file 41467_2024_48395_MOESM3_ESM.pdf]

## **Description of Additional Supplementary Files**

*Supplementary Data 1: Details of dating sample collection, radiocarbon date raw information, and Bayesian modelled ages of radiocarbon and OSL dates*

*Supplementary Code 1: Laili oxcal Bayesian Model: Bayesian model code for OxCal*
