# Supplementary material for: Abrupt onset of intensive human occupation 44,000 years ago on the threshold of Sahul
Source: PubMed Central journal article supplement (PMC11111772; doi:10.1038/s41467-024-48395-x), 2024-05-22
Supplement: 41467_2024_48395_MOESM6_ESM.pdf [file 41467_2024_48395_MOESM6_ESM.pdf]

## Reporting Summary

Nature Portfolio wishes to improve the reproducibility of the work that we publish. This form provides structure for consistency and transparency in reporting. For further information on Nature Portfolio policies, see our [Editorial Policies](#) and the [Editorial Policy Checklist](#).

### Statistics

For all statistical analyses, confirm that the following items are present in the figure legend, table legend, main text, or Methods section.

- |                                     |                                                                                                                                                                                                                                                                                                |
|-------------------------------------|------------------------------------------------------------------------------------------------------------------------------------------------------------------------------------------------------------------------------------------------------------------------------------------------|
| n/a                                 | Confirmed                                                                                                                                                                                                                                                                                      |
| <input type="checkbox"/>            | <input checked="" type="checkbox"/> The exact sample size ( $n$ ) for each experimental group/condition, given as a discrete number and unit of measurement                                                                                                                                    |
| <input type="checkbox"/>            | <input checked="" type="checkbox"/> A statement on whether measurements were taken from distinct samples or whether the same sample was measured repeatedly                                                                                                                                    |
| <input type="checkbox"/>            | <input checked="" type="checkbox"/> The statistical test(s) used AND whether they are one- or two-sided<br><i>Only common tests should be described solely by name; describe more complex techniques in the Methods section.</i>                                                               |
| <input checked="" type="checkbox"/> | <input type="checkbox"/> A description of all covariates tested                                                                                                                                                                                                                                |
| <input checked="" type="checkbox"/> | <input type="checkbox"/> A description of any assumptions or corrections, such as tests of normality and adjustment for multiple comparisons                                                                                                                                                   |
| <input type="checkbox"/>            | <input checked="" type="checkbox"/> A full description of the statistical parameters including central tendency (e.g. means) or other basic estimates (e.g. regression coefficient) AND variation (e.g. standard deviation) or associated estimates of uncertainty (e.g. confidence intervals) |
| <input type="checkbox"/>            | <input checked="" type="checkbox"/> For null hypothesis testing, the test statistic (e.g. $F$ , $t$ , $r$ ) with confidence intervals, effect sizes, degrees of freedom and $P$ value noted<br><i>Give <math>P</math> values as exact values whenever suitable.</i>                            |
| <input type="checkbox"/>            | <input checked="" type="checkbox"/> For Bayesian analysis, information on the choice of priors and Markov chain Monte Carlo settings                                                                                                                                                           |
| <input checked="" type="checkbox"/> | <input type="checkbox"/> For hierarchical and complex designs, identification of the appropriate level for tests and full reporting of outcomes                                                                                                                                                |
| <input checked="" type="checkbox"/> | <input type="checkbox"/> Estimates of effect sizes (e.g. Cohen's $d$ , Pearson's $r$ ), indicating how they were calculated                                                                                                                                                                    |

*Our web collection on [statistics for biologists](#) contains articles on many of the points above.*

### Software and code

Policy information about [availability of computer code](#)

Data collection

Data analysis

For manuscripts utilizing custom algorithms or software that are central to the research but not yet described in published literature, software must be made available to editors and reviewers. We strongly encourage code deposition in a community repository (e.g. GitHub). See the Nature Portfolio [guidelines for submitting code & software](#) for further information.

### Data

Policy information about [availability of data](#)

All manuscripts must include a [data availability statement](#). This statement should provide the following information, where applicable:

- Accession codes, unique identifiers, or web links for publicly available datasets
- A description of any restrictions on data availability
- For clinical datasets or third party data, please ensure that the statement adheres to our [policy](#)

All data used in this study are available in the Supplementary Information, the Supplementary Data file, or the Source Data file. Finds were labelled with the trench code LA19, the square (D/C/E), and the excavation unit (1-44). Finds are temporarily housed at the Australian National University and University College London, but long-term curation will be at the Timor-Leste Museum and Cultural Centre.

## Research involving human participants, their data, or biological material

Policy information about studies with [human participants or human data](#). See also policy information about [sex, gender \(identity/presentation\), and sexual orientation](#) and [race, ethnicity and racism](#).

|                                                                    |     |
|--------------------------------------------------------------------|-----|
| Reporting on sex and gender                                        | N/A |
| Reporting on race, ethnicity, or other socially relevant groupings | N/A |
| Population characteristics                                         | N/A |
| Recruitment                                                        | N/A |
| Ethics oversight                                                   | N/A |

Note that full information on the approval of the study protocol must also be provided in the manuscript.

## Field-specific reporting

Please select the one below that is the best fit for your research. If you are not sure, read the appropriate sections before making your selection.

Life sciences     Behavioural & social sciences     Ecological, evolutionary & environmental sciences

For a reference copy of the document with all sections, see [nature.com/documents/nr-reporting-summary-flat.pdf](https://nature.com/documents/nr-reporting-summary-flat.pdf)

## Ecological, evolutionary & environmental sciences study design

All studies must disclose on these points even when the disclosure is negative.

|                                   |                                                                                                                                                                                                                                                                                                                                                                                                                                                                                                                    |
|-----------------------------------|--------------------------------------------------------------------------------------------------------------------------------------------------------------------------------------------------------------------------------------------------------------------------------------------------------------------------------------------------------------------------------------------------------------------------------------------------------------------------------------------------------------------|
| Study description                 | Archaeology, a mixture of quantitative and qualitative methods                                                                                                                                                                                                                                                                                                                                                                                                                                                     |
| Research sample                   | 3 m square of sediment excavated to a depth of 2.5 m. A location in the middle of the shleter was chosen to give the most representative sample.                                                                                                                                                                                                                                                                                                                                                                   |
| Sampling strategy                 | Wet-sieving entire sample through 1 mm mesh. All stone artefacts and identifiable fish bone was examined. Molluscs from two square metres and tetrapod fauna from one square metre was examined due to time constraints of the specialists. These square metres were chosen to give the best representation of MIS3 layers (i.e. not cut into by large MIS2 pits) in the case of squares C and D, with the molluscs from square E examined so that we can invetigate the purpose of the large pits in future work. |
| Data collection                   | Pro forma excavation context sheets in the field. Calliper measurements of stone artefacts in the laboratory. Visual assessment against comparative collections of fauna in the laboratory. Adelaide Petrographics manufactured the micromorphology thin sections.                                                                                                                                                                                                                                                 |
| Timing and spatial scale          | Excavation in June 2019. Other data collection continued until January 2023.                                                                                                                                                                                                                                                                                                                                                                                                                                       |
| Data exclusions                   | Material from burrows identified during excavation was discarded as this has lost its stratigraphic integrity. Burrows were identified in 23 out of 130 excavation contexts.                                                                                                                                                                                                                                                                                                                                       |
| Reproducibility                   | Intra-observer reliability of the micropmorph slide interpretation was achieved by re-counting areas of selected thin sections.                                                                                                                                                                                                                                                                                                                                                                                    |
| Randomization                     | Group allocation was based on stratigraphic position.                                                                                                                                                                                                                                                                                                                                                                                                                                                              |
| Blinding                          | Blinding was not used as most researchers were involved in the fieldwork as well as the laboratory data collection.                                                                                                                                                                                                                                                                                                                                                                                                |
| Did the study involve field work? | <input checked="" type="checkbox"/> Yes <input type="checkbox"/> No                                                                                                                                                                                                                                                                                                                                                                                                                                                |

## Field work, collection and transport

|                        |                                                                                                                                                                                                                               |
|------------------------|-------------------------------------------------------------------------------------------------------------------------------------------------------------------------------------------------------------------------------|
| Field conditions       | It was warm and dry in Laleia over the excavation period.                                                                                                                                                                     |
| Location               | -8.540118, 126.163390                                                                                                                                                                                                         |
| Access & import/export | The excavation and export of finds was carried out with permission of the Timor-Leste Ministry of Higher Education, Science and Culture, under permit numbers: 71- and 136- /DGAC-SEAC/MESCC/VI2019, issued on 5th June 2019. |

## Reporting for specific materials, systems and methods

We require information from authors about some types of materials, experimental systems and methods used in many studies. Here, indicate whether each material, system or method listed is relevant to your study. If you are not sure if a list item applies to your research, read the appropriate section before selecting a response.

### Materials & experimental systems

- |                                     |                                                                   |
|-------------------------------------|-------------------------------------------------------------------|
| n/a                                 | Involved in the study                                             |
| <input checked="" type="checkbox"/> | <input type="checkbox"/> Antibodies                               |
| <input checked="" type="checkbox"/> | <input type="checkbox"/> Eukaryotic cell lines                    |
| <input type="checkbox"/>            | <input checked="" type="checkbox"/> Palaeontology and archaeology |
| <input checked="" type="checkbox"/> | <input type="checkbox"/> Animals and other organisms              |
| <input checked="" type="checkbox"/> | <input type="checkbox"/> Clinical data                            |
| <input checked="" type="checkbox"/> | <input type="checkbox"/> Dual use research of concern             |
| <input checked="" type="checkbox"/> | <input type="checkbox"/> Plants                                   |

### Methods

- |                                     |                                                 |
|-------------------------------------|-------------------------------------------------|
| n/a                                 | Involved in the study                           |
| <input checked="" type="checkbox"/> | <input type="checkbox"/> ChIP-seq               |
| <input checked="" type="checkbox"/> | <input type="checkbox"/> Flow cytometry         |
| <input checked="" type="checkbox"/> | <input type="checkbox"/> MRI-based neuroimaging |

## Palaeontology and Archaeology

- Specimen provenance
- Specimen deposition
- Dating methods
- Tick this box to confirm that the raw and calibrated dates are available in the paper or in Supplementary Information.
- Ethics oversight

Note that full information on the approval of the study protocol must also be provided in the manuscript.
